# Supplementary material for: Spatio-Temporal Determinants of Dengue Epidemics in the Central Region of Burkina Faso
Source: MDPI journal article supplement (doi:10.3390/tropicalmed8110482), 2023-10-25
Supplement: s1 [file s1]

## Sheet: Spatial analysis data
Districts	Health center	Longitude	Latitude	Population	Case
Baskuy	CMU Pogbi	-1.53389	12.3806	25901	76
Baskuy	CMU Samandin	-1.53278	12.3497	35526	71
Baskuy	CMU Gounghin	-1.5494	12.356	39747	22
Baskuy	CMU Gounghin 6 Ex 8	-1.5451	12.347	24091	27
Baskuy	CM Urbain	-1.53139	12.3714	69602	31
Baskuy	CSPS 8 Ex 10	-1.55306	12.3778	46084	71
Baskuy	CSPS 10 Ex 3	-1.54056	12.36	15957	55
Baskuy	service medico-scolaire (Yennega)	-1.5188	12.3534	15074	18
Baskuy	CSPS 11 ex 12	-1.52778	12.3817	30589	33
Baskuy	dispensaire larlé	-1.545	12.37	8638	19
Boulmiougou	CM Dassouri	-1.71986	12.2669	21337	9
Boulmiougou	CMU Nagrin	-1.53444	12.2867	75653	13
Boulmiougou	CSPS Bassemyam	-1.54389	12.2091	7080	2
Boulmiougou	CSPS Dayoubsi	-1.60392	12.236	3907	18
Boulmiougou	CSPS Kalzi	-1.63961	12.1201	5680	0
Boulmiougou	CSPS Komsilga	-1.63547	12.1783	6622	4
Boulmiougou	CSPS Tampouy	-1.68828	12.1218	5222	0
Boulmiougou	CSPS Zinguedessé	-1.58228	12.2454	3480	0
Boulmiougou	CSPS Bazoulé	-1.70844	12.3196	10876	10
Boulmiougou	CSPS Boassa	-1.62036	12.2963	5048	0
Boulmiougou	CSPS Boulsin	-1.766	12.39	5918	0
Boulmiougou	CSPS Cissin 17	-1.54958	12.3363	70403	33
Boulmiougou	CSPS Doudoulma	-1.72806	12.4003	9767	3
Boulmiougou	CSPS Kienfangue	-1.556	12.2	9944	32
Boulmiougou	CSPS Koudiere	-1.75794	12.2332	12040	4
Boulmiougou	CSPS Lao	-1.69642	12.218	3284	5
Boulmiougou	CSPS Lougsi	-1.64714	12.2416	4409	0
Boulmiougou	CSPS Ponsomtenga	-1.49492	12.2388	4566	0
Boulmiougou	CSPS Sandogo	-1.59764	12.3193	36026	90
Boulmiougou	CSPS Sané	-1.75806	12.3461	7247	82
Boulmiougou	CSPS secteur 16	-1.5314	12.3136	91640	45
Boulmiougou	CSPS secteur 18	-1.58056	12.3478	33734	20
Boulmiougou	CSPS secteur 19	-1.56306	12.3764	92360	183
Boulmiougou	CSPS secteur 28 (pissy)	-1.56482	12.3358	130185	2
Boulmiougou	CSPS Silmissin	-1.766	12.29	11448	0
Boulmiougou	CSPS Tampoussoumdi	-1.67897	12.181	2207	0
Boulmiougou	CSPS Tinguedalgué	-1.60025	12.2652	10410	0
Boulmiougou	CSPS Tingandogo	-1.546	12.27	47846	2
Boulmiougou	CSPS Tintoulou nord	-1.79936	12.2191	4664	21
Boulmiougou	CSPS Tintoulou sud	-1.79931	12.1938	9532	11
Boulmiougou	CSPS Vipalogo	-1.76169	12.1179	7692	30
Boulmiougou	CSPSP Yaoghin	-1.74353	12.1961	2848	16
Boulmiougou	CSPS Yimdi	-1.67978	12.2999	5025	0
Boulmiougou	CSPS Zagtouli	-1.62617	12.3262	35318	12
Boulmiougou	CSPS Zékounga	-1.67458	12.3907	2825	0
Boulmiougou	CSPS Zongo	-1.58933	12.3546	52646	23
Boulmiougou	Dispensaire Pissy 17	-1.57741	12.3348	70403	38
Bogodogo	AMA	-1.46117	12.3807	29624	4
Bogodogo	Balkoui	-1.45547	12.2903	18764	3
Bogodogo	Dayongo	-1.44294	12.3141	12729	25
Bogodogo	Dassasgho	-1.4825	12.3844	29580	24
Bogodogo	Didri	-1.25997	12.2024	13211	0
Bogodogo	Gampéla	-1.3925	12.4275	10429	18
Bogodogo	Gonsé	-1.32278	12.4589	3881	1
Bogodogo	Guiguimtenga	-1.46376	12.2404	4866	2
Bogodogo	Juvénat Filles	-1.47456	12.3784	21590	26
Bogodogo	Koala	-1.26028	12.3881	7176	113
Bogodogo	Manegsombo	-1.32278	12.4589	2275	120
Bogodogo	Monastère	-1.353	12.2122	6765	0
Bogodogo	Koubri (nagbangre)	-1.4005	12.1891	23218	0
Bogodogo	Nioko1	-1.43601	12.3922	30592	32
Bogodogo	Noomwendé	-1.47253	12.3244	17037	13
Bogodogo	Nongtaaba	-1.47914	12.308	4559	10
Bogodogo	Peelé	-1.19067	12.2688	5366	176
Bogodogo	Pikiéko	-1.11844	12.2532	5304	3
Bogodogo	Saaba	-1.41428	12.364	37123	94
Bogodogo	CMU Sect15	-1.52486	12.3301	65203	276
Bogodogo	Sect30	-1.48081	12.3445	86199	45
Bogodogo	Sinsinguené	-1.29247	12.2661	4197	75
Bogodogo	St camille	-1.49529	12.3666	21133	56
Bogodogo	Tanghin	-1.39583	12.3297	3964	0
Bogodogo	Tanlarghin	-1.3845	12.2978	10409	2
Bogodogo	Tansablogo	-1.16067	12.1959	10513	0
Bogodogo	Tansobintenga	-1.39583	12.3464	5891	0
Bogodogo	TA Ouaga 2000	-1.48842	12.3076	11586	7
Bogodogo	TA S28	-1.45944	12.3833	101052	83
Bogodogo	TA30	-1.46244	12.3165	27015	2
Bogodogo	Wemtenga	-1.49083	12.3706	109735	34
Bogodogo	Wennefangdé	-1.43214	12.4073	17342	21
Bogodogo	Yamtenga	-1.45003	12.3349	63307	0
Bogodogo	Boudtenga	-1.277	12.48	2639	0
Bogodogo	Tanvi-Nakamtenga	-1.331	12.24	3839	5
Signoghin	CSPS Bassinko	-1.63472	12.3908	13339	5
Signoghin	CSPS Bissighin	-1.61433	12.3959	13910	5
Signoghin	CSPS Gaskaye	-1.60481	12.6507	4064	1
Signoghin	CSPS Goupana	-1.58831	12.6158	7718	46
Signoghin	CSPS Kamboincé	-1.55503	12.4642	9995	7
Signoghin	CSPS Kondemtoré	-1.48381	12.5473	2313	0
Signoghin	CSPS Nedogo	-1.65339	12.5469	13275	0
Signoghin	CSPS Pabré	-1.58964	12.5317	17048	1
Signoghin	CSPS Sabtenga	-1.67097	12.4508	13519	0
Signoghin	CSPS Sag-Nioniogo	-1.46636	12.5341	2302	0
Signoghin	CMUsecteur 20	-1.57322	12.3857	52147	16
Signoghin	CSPS secteur 21	-1.57533	12.3948	71683	62
Signoghin	CSPS secteur 22	-1.57033	12.3996	82254	116
Signoghin	CSPS Yamba	-1.50111	12.5175	6102	34
Signoghin	CSPS Zibako	-1.6405	12.551	4884	49
Signoghin	CSPS Zouma	-1.60278	12.6024	4092	7
Signoghin	CSPS de Yagma	-1.605	12.44	3688	11
Signoghin	CSPS de Bilgo	-1.684	12.53	5093	0
Signoghin	CSPS Marcoussi	-1.602	12.42	1384	47
Signoghin	CSPS Pazani	-1.5786	12.4405	6140	9
Nongr-Masson	CSPS 13	-1.49061	12.3776	36153	42
Nongr-Masson	CSPS 23	-1.52597	12.3944	145463	219
Nongr-Masson	CSPS 25	-1.50961	12.4126	52543	10
Nongr-Masson	CSPS 26	-1.46786	12.4177	16448	122
Nongr-Masson	CSPS 27	-1.47764	12.399	83832	39
Nongr-Masson	CSPS Polesgo	-1.51419	12.4393	6064	23
Nongr-Masson	CSPS Sakoula	-1.52958	12.4621	2573	0
Nongr-Masson	CSPS Roumtenga	-1.47506	12.4774	5756	8
Nongr-Masson	CSPS Songdin	-1.50131	12.4831	2268	6

## Sheet: Climate parameters
Period(weeks)	Total cas	Population	Incidence	NDVI	Wind	Rain	Maximal temperature	Minimal temperature	Minimal humidity	Maximal himidity
1	12	2744666	0.437212	0.236390419938463	6.775746559937817	0	42.7354064941406	16.800012588500977	27.700000762939453	14.791666984558105
2	21	2744666	0.76512	0.236390419938463	6.553571722255386	0	41.912498474121094	15.825006484985352	24.424999237060547	13.337499618530273
3	21	2744666	0.76512	0.236390419938463	5.931552794480792	0	44.724998474121094	18.524988174438477	19.649999618530273	11.262499809265137
4	20	2744666	0.728686	0.236390419938463	7.236771956427464	0	45.037498474121094	18.006250381469727	17.734375000000000	10.859375
5	24	2744666	0.874423	0.215478718439315	5.862757553596055	0	45.74999237060547	19.300012588500977	19.000000000000000	10.837499618530273
6	9	2744666	0.327909	0.215478718439315	7.237429203757569	0	46.584373474121094	19.2499942779541	17.737499237060547	8.65625
7	9	2744666	0.327909	0.215478718439315	8.677917986834673	0	46.162498474121094	21.3124942779541	17.600000381469727	9.168749809265137
8	10	2744666	0.364343	0.215478718439315	5.728567039222054	0	48.362510681152344	20.350000381469723	16.537500381469727	8.449999809265137
9	5	2744666	0.182172	0.204230845925656	6.470871175734621	0	53.209373474121094	20.662500381469727	13.787500381469727	7.15625
10	37	2744666	1.34807	0.204230845925656	6.942387019296347	0	52.146873474121094	20.8124942779541	16.000000000000000	6.609375
11	5	2744666	0.182172	0.204230845925656	5.075313699735331	0	54.812492370605476	22.568750381469727	17.796875000000000	11.300000190734863
12	4	2744666	0.145737	0.204230845925656	5.049909131158231	0.728680014610291	50.32500457763672	25.01250648498535	29.500000000000000	14.524999618530273
13	2	2744666	0.0728686	0.204230845925656	5.712905840260976	0	55.959373474121094	24.271875381469727	15.046875000000000	11.585937500000002
14	3	2744666	0.109303	0.213854249963101	4.319709686056782	12.839950323104858	49.57500457763671	26.021875381469727	54.062500000000000	27.225000381469727
15	2	2744666	0.0728686	0.213854249963101	5.38425847351241	0	55.32500457763672	24.4999942779541	17.649999618530273	9.71875
16	2	2744666	0.0728686	0.213854249963101	4.832670150720732	1.348181635141373	53.237510681152344	26.487512588500973	29.412500381469727	17.28125
17	3	2744666	0.109303	0.213854249963101	5.443656728825085	81.10763931274414	49.31249237060547	28.2499942779541	43.750000000000000	32.70000076293945
18	7	2744666	0.25504	0.241534036366229	5.246747396224367	74.99348258972168	48.20000457763672	27.693750381469723	49.875000000000000	37.150001525878906
19	3	2744666	0.109303	0.241534036366229	5.670236880842605	127.43716049194336	46.037498474121094	27.0624942779541	52.049999237060547	34.40625
20	0	2744666	0	0.241534036366229	5.379849346356655	260.5319061279297	44.021873474121094	27.912500381469727	46.916667938232422	45.875
21	4	2744666	0.145737	0.241534036366229	4.927795872489001	42.91632556915283	44.237510681152344	27.287500381469727	59.437500000000000	41.79999923706055
22	2	2744666	0.0728686	0.241534036366229	5.553631494356664	34.85789632797241	46.287498474121094	27.51250648498535	59.150001525878906	39.15625
23	4	2744666	0.145737	0.319851056692448	4.78737261573625	203.86207580566406	44.584373474121094	26.896875381469727	67.375000000000000	43.625
24	1	2744666	0.0364343	0.319851056692448	4.878896081156924	45.4524040222168	34.928123474121094	25.899988174438477	66.550003051757813	49.5625
25	0	2744666	0	0.319851056692448	4.459149788592928	130.61144256591797	36.08748779296875	25.60000038146973	71.000000000000014	50.099998474121094
26	3	2744666	0.109303	0.319851056692448	4.035103473856828	36.47186851501465	37.443748474121094	24.82915687561035	65.500000000000000	50.5625
27	5	2744666	0.182172	0.428837224207026	4.189959940314085	146.98051834106445	37.51250457763672	26.053125381469727	65.937500000000000	52.45000076293945
28	8	2744666	0.291474	0.428837224207026	4.017383309412105	64.16681098937988	34.987510681152344	24.612512588500977	77.400001525878906	56.45000076293945
29	12	2744666	0.437212	0.428837224207026	3.678029295127125	136.79341316223145	37.787498474121094	25.568750381469727	74.875000000000000	49.75
30	9	2744666	0.327909	0.428837224207026	3.587398586147765	60.355942726135254	37.212486267089844	25.271875381469727	74.375000000000000	51.54999923706055
31	8	2744666	0.291474	0.469646797535267	2.968534704203437	64.78018760681152	36.18749237060547	25.021875381469727	71.500000000000000	53.45000076293945
32	40	2744666	1.45737	0.469646797535267	3.5206570682596	91.22919273376465	34.70000457763672	23.0624942779541	87.199996948242188	55.45000076293945
33	35	2744666	1.2752	0.469646797535267	4.097383557094223	349.30835723876953	37.24999237060547	25.050012588500977	66.650001525878906	45.5
34	58	2744666	2.11319	0.469646797535267	3.895546005900371	183.16316604614258	34.459373474121094	24.32500648498535	88.800003051757813	52.8125
35	108	2744666	3.93491	0.469646797535267	3.895546005900371	141.64482879638672	34.050010681152344	24.86251220703125	84.699996948242188	58.349998474121094
36	69	2744666	2.51397	0.48095637306254	3.249422637024063	41.13392353057861	37.428123474121094	24.287500381469727	75.750000000000000	50
37	195	2744666	7.10469	0.48095637306254	3.186124537822571	71.41016006469727	34.693748474121094	24.537500381469727	72.550003051757813	48.375
38	177	2744666	6.44887	0.48095637306254	3.123365594649037	55.85924530029297	36.209373474121094	24.550012588500977	76.900001525878906	50
39	354	2744666	12.8977	0.48095637306254	3.891062301956093	59.58629322052002	40.399986267089844	25.550012588500977	60.200000762939453	41.04999923706055
40	525	2744666	19.128	0.368360627838906	3.316578691793743	9.416730403900146	41.43749237060547	24.962488174438477	64.750000000000000	36.32500076293945
41	765	2744666	27.8722	0.368360627838906	4.298781089268329	0.151579484343529	43.399986267089844	24.57500648498535	52.450000762939453	32.20000076293945
42	1263	2744666	46.0165	0.368360627838906	4.367844048464271	0	46.396873474121094	21.6000000000000	34.974998474121094	18.609375
43	1451	2744666	52.8662	0.368360627838906	5.033348032446647	0	44.68749237060547	20.7250000000000	37.375000000000000	18.262500762939453
44	996	2744666	36.2886	0.269990419295240	5.379301621911282	0	46.3250061035156	20.7625061035156	29.200000762939453	18.125
45	1036	2744666	37.7459	0.269990419295240	4.603186423559293	0	46.678123474121094	20.303125381469727	30.687499999999996	14.15625
46	633	2744666	23.0629	0.269990419295240	4.940051326138491	0	45.70000457763672	19.600000381469727	24.924999237060547	11.837499618530273
47	402	2744666	14.6466	0.269990419295240	4.940051326138491	1.470000088214874	43.803123474121094	20.912500381469727	25.468750000000000	15.078125
48	372	2744666	13.5536	0.269990419295240	5.859427329005213	0	45.6249938964844	18.637506103515600	25.399999618530273	11.925000190734865
49	203	2744666	7.39616	0.238714887740764	6.544334185484744	0	41.399986267089844	18.70000648498535	28.600000381469727	13.6875
50	174	2744666	6.33957	0.238714887740764	5.352879252398543	0	42.425010681152344	19.162500381469727	31.649999618530273	16.637500762939453
51	229	2744666	8.34346	0.238714887740764	6.675453178962488	0	38.72499847412109	16.865625	28.625000000000000	19.399999618530273
52	135	2744666	4.91863	0.238714887740764	7.231067191676813	0	41.412498474121094	16.990625381469727	27.700000762939453	13.8125

## Sheet: General additve model data
Total cases	Population	Dimension1	Dimension2
12	2744666	1.17664438	2.8171057
21	2744666	1.76198428	3.5369699
21	2744666	1.87520320	3.6737111
20	2744666	1.78004366	2.3882624
24	2744666	2.33503435	1.8270389
9	2744666	2.09134981	-0.4493559
9	2744666	2.54126910	0.1322762
10	2744666	3.18652700	-0.1704374
5	2744666	2.46624749	0.1756472
37	2744666	2.88716989	0.4800170
5	2744666	3.32935193	0.8332841
4	2744666	2.39639406	1.9076523
2	2744666	1.18943179	2.6539118
3	2744666	1.78424989	4.3602026
2	2744666	0.72414307	4.3275493
2	2744666	1.29283784	4.6754804
3	2744666	1.07052962	4.4715142
7	2744666	0.22740364	6.0176299
3	2744666	0.01562529	6.3028370
0	2744666	0.03826609	5.5036022
4	2744666	0.50937586	4.7755704
2	2744666	0.34523603	3.4984172
4	2744666	0.07352922	3.6842043
1	2744666	0.88225416	1.0247086
0	2744666	1.19777370	1.0526691
3	2744666	1.66323318	0.2350570
5	2744666	1.37693087	-1.4513418
8	2744666	2.29797338	-0.4250263
12	2744666	2.89460552	0.5149772
9	2744666	3.08667914	0.7751338
8	2744666	2.80430730	1.1267794
40	2744666	3.21883104	0.8607141
35	2744666	3.82444286	1.8968959
58	2744666	4.51282306	1.9536584
108	2744666	4.86895104	1.9045602
69	2744666	4.83978987	0.7886854
195	2744666	3.48453675	1.2802373
177	2744666	3.20784298	1.7363518
354	2744666	3.34617141	1.9792299
525	2744666	2.15729903	1.4389446
765	2744666	1.04247089	0.7512404
1263	2744666	0.34654212	0.2374700
1451	2744666	0.11103457	0.5857615
996	2744666	0.13624792	1.1691175
1036	2744666	0.54234101	1.3029321
633	2744666	0.65251753	1.3146681
402	2744666	0.81877690	0.8941668
372	2744666	0.67988726	1.1016902
203	2744666	1.10977787	1.5857998
174	2744666	1.33362823	2.1382231
229	2744666	0.92583004	2.5398758
135	2744666	1.04400730	4.1276970
